# Supplementary material
Source: Springer Nature journal article supplement (https://www.springermedizin.de/resource/supplementary/12889_2013_6520_MOESM8_ESM.pdf/9498350)

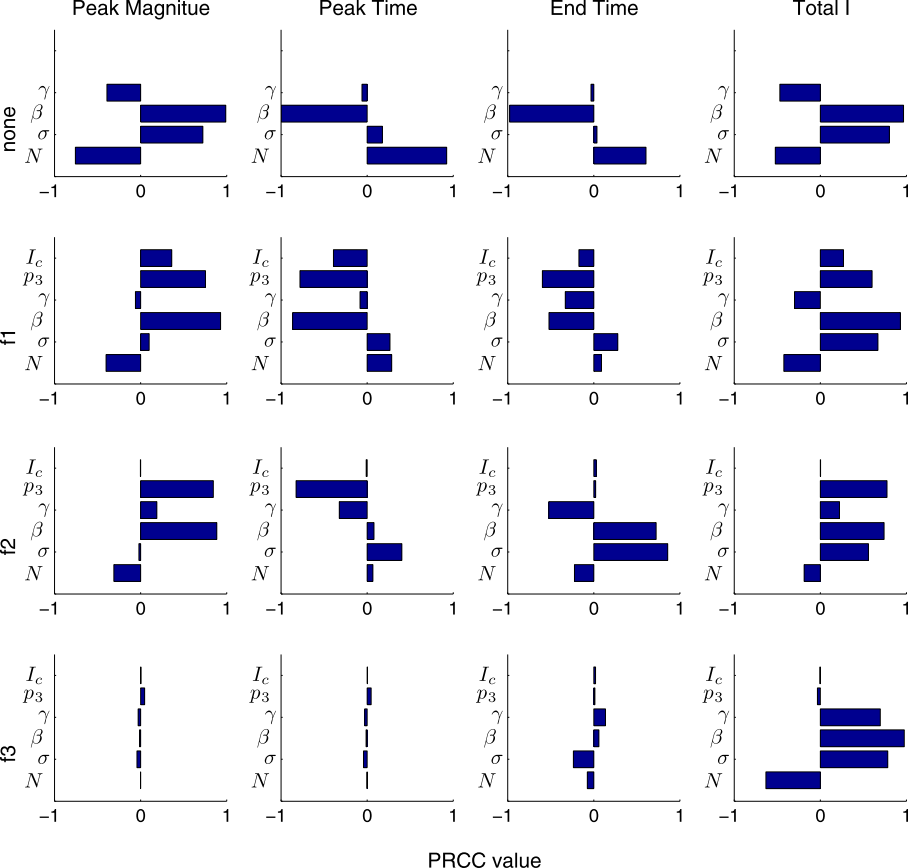

Supplement: MOESM8 [file 9498350]
